# Supplementary material for: WBC as a mediator between TG/HDL Ratio and gallstone disease across gender differences: NHANES 2017–2020
Source: Research Square preprint supplement (doi:10.21203/rs.3.rs-6300847/v1), 2025-03-26
Supplement: Supplementary file 1 [file 6b52b44751421a4c494d7158.docx]

**Supplementary Table S2** Multiplicative and additive interactions of WBC with TG/HDL in relation to gallstone risk

| Risk of gallstone | TG/HDL | WBC | OR(95% CI) | P for interaction | Measures of additive interaction | | | |
| --- | --- | --- | --- | --- | --- | --- | --- | --- |
| RERI (95% CI) | p | AP (95% CI) | p |
| gallstone | Low | Normal | 1.00 | 0.12 | -0.46(-1.1~0.19) | 0.92 | -0.39(-0.95~0.18) | 0.09 |
| High |  | 1.34 (0.92~1.94) |  |  |
| Low | High | 1.3 (0.93~1.8) |  |  |
| High |  | 1.18 (0.83~1.67) |  |  |

Note: Adjusted for age, race, education level, PIR, BMI, smoking status, hypertension, DM, physical activities status.
