# Supplementary material for: WBC as a mediator between TG/HDL Ratio and gallstone disease across gender differences: NHANES 2017–2020
Source: Research Square preprint supplement (doi:10.21203/rs.3.rs-6300847/v1), 2025-03-26
Supplement: Supplementary file 2 [file f4033db1a62b70d4995fed66.docx]

**Supplementary Table S1** Threshold effect analysis of the relationship of TG/HDL with gallstones

| TG/HDL ratio | Adjusted Model | |
| --- | --- | --- |
|  | OR (95% CI) | p-value |
| <2.794 | 1.184 (0.935~1.499) | 0.161 |
| ≥2.794 | 0.983 (0.853~1.134) | 0.816 |
| Likelihood Ratio test |  | 0.106 |
| tested by LRT |  | 0.050 |

OR, odds ratio; CI, confidence interval. Adjusted for sex, age, race, education level, PIR, BMI, smoking status, hypertension, DM, physical activities status, ALT, and AST. Only 99.5% of the data is displayed.
